# Supplementary material for: Synthesis of transition metal isocyanide compounds from carbonyl complexes via reaction with Li[Me3SiNR]
Source: Royal Society of Chemistry journal article supplement (doi:10.1039/b917156h), 2009-01-01
Supplement: b917156h.pdf [file b917156h.pdf]

## SUPPORTING INFORMATION

# Synthesis of Transition Metal Isocyanide Compounds from Carbonyl Complexes *via* Reaction with Li[Me<sub>3</sub>SiNR]

Wesley Sattler and Gerard Parkin,\*

*Department of Chemistry,*

*Columbia University,*

*New York, New York 10027, USA.*

*Received xxxx xx, 2009.*

---

## EXPERIMENTAL SECTION

### General Considerations

All manipulations were performed using a combination of dry glovebox, high vacuum, and Schlenk techniques under a nitrogen or argon atmosphere,<sup>1</sup> with the exception of chromatography that was performed in air. Solvents were purified and degassed by standard procedures. <sup>1</sup>H NMR spectra were measured on Bruker 300 DRX, Bruker 400 DRX, and Bruker Avance 500 DMX spectrometers. <sup>1</sup>H chemical shifts are reported in ppm relative to SiMe<sub>4</sub> ( $\delta = 0$ ) and were referenced internally with respect to the protio solvent impurity ( $\delta 7.16$  for C<sub>6</sub>D<sub>5</sub>H).<sup>2</sup> Coupling constants are given in hertz. Infrared spectra were recorded on Nicolet Avatar 370 DTGS spectrometer and are reported in cm<sup>-1</sup>. Mass spectra were obtained on a Micromass Quadrupole-Time-of-Flight mass spectrometer using fast atom bombardment (FAB). All chemicals were obtained from Aldrich, with the exception of Cr(CO)<sub>6</sub> and W(CO)<sub>6</sub> which were obtained from Strem.

### X-ray Structure Determinations

X-ray diffraction data were collected on a Bruker Apex II diffractometer. Crystal data, data collection and refinement parameters are summarized in Table 1. The structures were solved using direct methods and standard difference map techniques, and were refined by full-matrix least-squares procedures on  $F^2$  with SHELXTL (Version 6.1).<sup>3</sup>

### Synthesis of Li[Me<sub>3</sub>SiNBu<sup>t</sup>]

Li[Me<sub>3</sub>SiNBu<sup>t</sup>] was prepared by an adaptation of a literature method. A solution of Bu<sup>n</sup>Li in hexanes (2.5 M, 3.2 mL, 8.0 mmol) was added dropwise to a solution of Me<sub>3</sub>SiN(Bu<sup>t</sup>)H (1.32 mL, 6.9 mmol) in Et<sub>2</sub>O (*ca.* 10 mL) at -78 °C. The mixture was stirred for 20 minutes at -78 °C, allowed to warm to room temperature, and then stirred for 6 hours. After this period, the solution was concentrated to a volume of *ca.* 1 mL, thereby inducing the deposition of a white precipitate. *n*-Hexane (*ca.* 5 mL) was added and the mixture was filtered and the precipitate was dried *in vacuo* overnight, giving

Li[Me<sub>3</sub>SiNBu<sup>t</sup>] as a fine white powder (0.94 g, 90 %). <sup>1</sup>H NMR (C<sub>6</sub>D<sub>6</sub>): 0.2 – 0.4 [bm, 9H, (CH<sub>3</sub>)<sub>3</sub>SiNBu<sup>t</sup>], 1.2 – 1.4 [bm, 9H, Me<sub>3</sub>SiNC(CH<sub>3</sub>)<sub>3</sub>].

### Synthesis of Cr(CO)<sub>5</sub>(CNBu<sup>t</sup>)

A mixture of Cr(CO)<sub>6</sub> (12 mg, 0.05 mmol) and Li[Me<sub>3</sub>SiNBu<sup>t</sup>] (9 mg, 0.06 mmol) placed in an NMR tube equipped with a J. Young valve was treated with C<sub>6</sub>D<sub>6</sub> (0.7 mL). The sample was heated at 60 °C, shaken periodically, and monitored by <sup>1</sup>H NMR spectroscopy, thereby indicating the formation of Cr(CO)<sub>5</sub>(CNBu<sup>t</sup>) after a period of 150 minutes. The resulting mixture was purified by flash column chromatography (silica gel, hexanes) in air to give Cr(CO)<sub>5</sub>(CNBu<sup>t</sup>) as a microcrystalline solid (9 mg, 60 %) after removal of the solvent *in vacuo*. <sup>1</sup>H NMR (C<sub>6</sub>D<sub>6</sub>): 0.68 [s, CNC(CH<sub>3</sub>)<sub>3</sub>]. IR data (hexanes, cm<sup>-1</sup>): ν<sub>CN</sub> = 2151 (m); ν<sub>CO</sub> = 2060 (m), 1958 (s) and 1930 (w).<sup>4</sup> Crystals suitable for X-ray diffraction were obtained from hexanes.

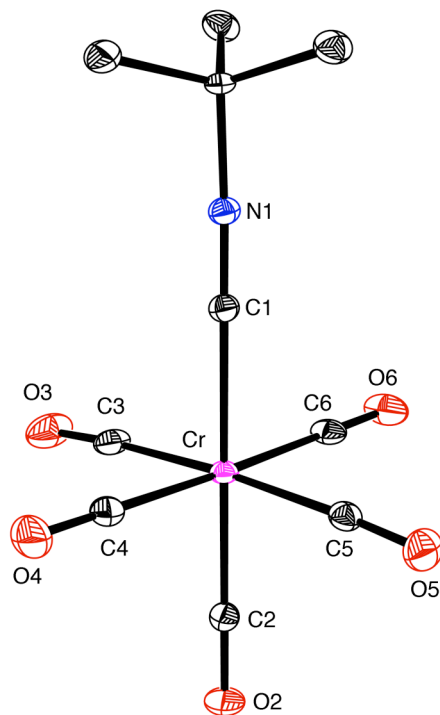

*Molecular Structure of Cr(CO)<sub>5</sub>(CNBu<sup>t</sup>)*

### Synthesis of Mo(CO)<sub>5</sub>(CNBu<sup>t</sup>)

A mixture of Mo(CO)<sub>6</sub> (15 mg, 0.06 mmol) and Li[Me<sub>3</sub>SiNBu<sup>t</sup>] (9 mg, 0.06 mmol) placed in an NMR tube equipped with a J. Young valve was treated with C<sub>6</sub>D<sub>6</sub> (0.7 mL). The sample was heated at 60 °C, shaken periodically, and monitored by <sup>1</sup>H NMR spectroscopy, thereby indicating the formation of Mo(CO)<sub>5</sub>(CNBu<sup>t</sup>) after a period of 30 minutes. The resulting mixture was purified by flash column chromatography (silica gel, hexanes) to give Mo(CO)<sub>5</sub>(CNBu<sup>t</sup>) as a microcrystalline solid (13 mg, 71 %) after removal of the solvent *in vacuo*. <sup>1</sup>H NMR (C<sub>6</sub>D<sub>6</sub>): 0.68 [1:1:1 t, <sup>3</sup>J<sub>N-H</sub> = 2, CN(CH<sub>3</sub>)<sub>3</sub>]. IR data (hexanes, cm<sup>-1</sup>): ν<sub>CN</sub> = 2152 (m); ν<sub>CO</sub> = 2066 (m), 1959 (s) and 1928 (w).<sup>4</sup>

### Synthesis of W(CO)<sub>5</sub>(CNBu<sup>t</sup>)

A mixture of W(CO)<sub>6</sub> (20 mg, 0.06 mmol) and Li[Me<sub>3</sub>SiNBu<sup>t</sup>] (9 mg, 0.06 mmol) placed in an NMR tube equipped with a J. Young valve was treated with C<sub>6</sub>D<sub>6</sub> (0.7 mL). The sample was heated at 60 °C, shaken periodically, and monitored by <sup>1</sup>H NMR spectroscopy, thereby indicating the formation of W(CO)<sub>5</sub>(CNBu<sup>t</sup>) after a period of 30 minutes. The resulting mixture was purified by flash column chromatography (silica gel, hexanes) to give W(CO)<sub>5</sub>(CNBu<sup>t</sup>) as a microcrystalline solid (13 mg, 56 %) after removal of the solvent *in vacuo*. <sup>1</sup>H NMR (C<sub>6</sub>D<sub>6</sub>): 0.66 [s, CNC(CH<sub>3</sub>)<sub>3</sub>]. IR data (hexanes, cm<sup>-1</sup>): ν<sub>CN</sub> = 2153 (m); ν<sub>CO</sub> = 2062 (m), 1954 (s) and 1923 (w).<sup>4</sup>

### Synthesis of *cis*-Cr(CO)<sub>4</sub>(CNBu<sup>t</sup>)<sub>2</sub>

A mixture of Cr(CO)<sub>6</sub> (12 mg, 0.05 mmol) and Li[Me<sub>3</sub>SiNBu<sup>t</sup>] (17 mg, 0.11 mmol) placed in an NMR tube equipped with a J. Young valve was treated with C<sub>6</sub>D<sub>6</sub> (0.7 mL). The sample was heated at 60 °C, shaken periodically, and monitored by <sup>1</sup>H NMR spectroscopy, thereby indicating the formation of *cis*-Cr(CO)<sub>4</sub>(CNBu<sup>t</sup>)<sub>2</sub> after a period of 20 hours. The mixture was filtered through silica gel (*ca.* 1 mL) and eluted with hexanes (*ca.* 10 mL) and dichloromethane (*ca.* 5 mL). The combined filtrate was concentrated to a volume of *ca.* 3 mL and placed at -15 °C, thereby depositing colorless crystals of *cis*-

$\text{Cr}(\text{CO})_4(\text{CNBu}^t)_2$  which were isolated by decanting and dried *in vacuo* (6 mg, 33 %). The mother liquor was placed at  $-15\text{ }^\circ\text{C}$ , thereby depositing a second crop of colorless crystals (7 mg), composed of a *ca.* 1:1 mixture of *cis*- $\text{Cr}(\text{CO})_4(\text{CNBu}^t)_2$  and  $\text{Cr}(\text{CO})_5(\text{CNBu}^t)$ .  $^1\text{H NMR}$  ( $\text{C}_6\text{D}_6$ ): 0.85 [s,  $\text{CNC}(\text{CH}_3)_3$ ]. IR data (hexanes,  $\text{cm}^{-1}$ ):  $\nu_{\text{CN}} = 2145$  (w) and  $2107$  (m);  $\nu_{\text{CO}} = 2010$  (m) and  $1926$  (s).<sup>4</sup> Crystals suitable for X-ray diffraction were obtained from hexanes at  $-15\text{ }^\circ\text{C}$ .

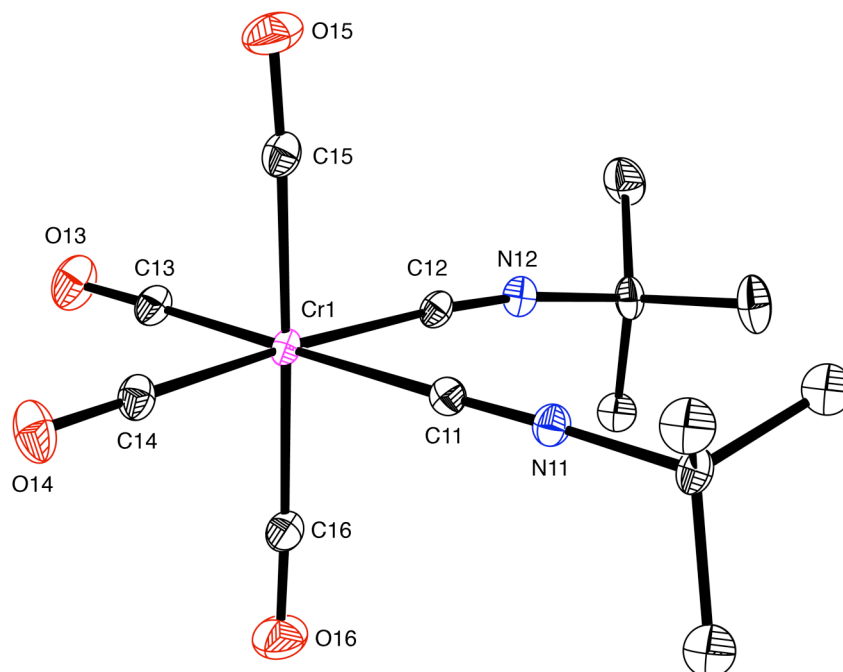

*Molecular Structure of cis-Cr(CO)<sub>4</sub>(CNBu<sup>t</sup>)<sub>2</sub>*

**Synthesis of *cis*-Mo(CO)<sub>4</sub>(CNBu<sup>t</sup>)<sub>2</sub>** (a) A mixture of  $\text{Mo}(\text{CO})_6$  (36 mg, 0.14 mmol) and  $\text{Li}[\text{Me}_3\text{SiNBu}^t]$  (50 mg, 0.33 mmol) placed in an NMR tube equipped with a J. Young valve was treated with  $\text{C}_6\text{D}_6$  (0.7 mL). The sample was shaken periodically and monitored by  $^1\text{H NMR}$  spectroscopy, thereby indicating the formation of *cis*- $\text{Mo}(\text{CO})_4(\text{CNBu}^t)_2$  after a period of 37 hours at room temperature.<sup>5</sup> The mixture was filtered through silica gel (*ca.* 1 mL) and eluted with hexanes (*ca.* 10 mL). The combined filtrate was concentrated to a volume of *ca.* 3 mL and placed at  $-15\text{ }^\circ\text{C}$ , thereby depositing colorless crystals of *cis*- $\text{Mo}(\text{CO})_4(\text{CNBu}^t)_2$  which were isolated and dried *in vacuo* (41 mg, 81 %).  $^1\text{H NMR}$  ( $\text{C}_6\text{D}_6$ ): 0.82 [s,  $\text{CNC}(\text{CH}_3)_3$ ]. IR data (hexanes,  $\text{cm}^{-1}$ ):  $\nu_{\text{CN}}$

= 2146 (w) and 2109 (m);  $\nu_{\text{CO}}$  = 2014 (m) and 1928 (s).<sup>4</sup> Crystals suitable for X-ray diffraction were obtained from hexanes at  $-15\text{ }^{\circ}\text{C}$ .

(b) A mixture of  $\text{Mo}(\text{CO})_6$  (1.00 g, 3.79 mmol) and  $\text{Li}[\text{Me}_3\text{SiNBu}^t]$  (1.26 g, 8.33 mmol) was treated with  $\text{Et}_2\text{O}$  (45 mL) at  $-78\text{ }^{\circ}\text{C}$ , and then allowed to warm to room temperature with stirring. After a period of 1 day, an additional quantity of  $\text{Li}[\text{Me}_3\text{SiNBu}^t]$  (600 mg, 3.97 mmol) was added at  $-78\text{ }^{\circ}\text{C}$ . The mixture was stirred for an additional 12 hours. After this period, the volatile components were removed *in vacuo*. Hexanes (*ca.* 10 mL) were added and the mixture was filtered through silica gel (*ca.* 25 mL) and eluted with hexanes (*ca.* 350 mL). The filtrate was placed at  $-15\text{ }^{\circ}\text{C}$ , thereby depositing colorless crystals of *cis*- $\text{Mo}(\text{CO})_4(\text{CNBu}^t)_2$  which were isolated and dried *in vacuo* (506 mg). The mother liquor was then concentrated to *ca.* 50 mL and placed at  $-15\text{ }^{\circ}\text{C}$ , thereby depositing a second batch of colorless crystals of a 4:1 mixture of *cis*- $\text{Mo}(\text{CO})_4(\text{CNBu}^t)_2$  and  $\text{Mo}(\text{CO})_5(\text{CNBu}^t)$  which were isolated and dried *in vacuo* (151 mg).

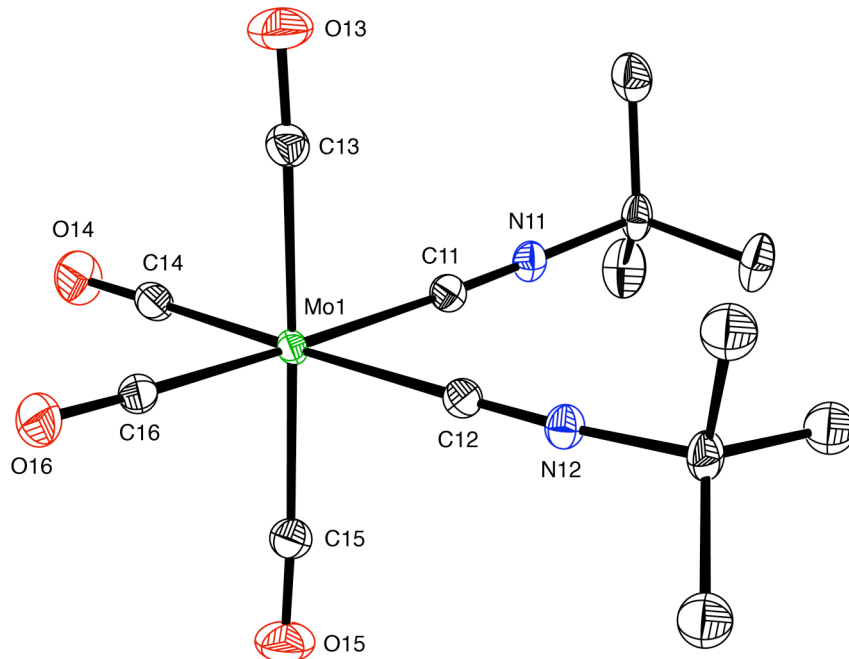

*Molecular Structure of cis-Mo(CO)<sub>4</sub>(CNBu<sup>t</sup>)<sub>2</sub>*

### Synthesis of *cis*-W(CO)<sub>4</sub>(CNBu<sup>t</sup>)<sub>2</sub>

A mixture of W(CO)<sub>6</sub> (20 mg, 0.06 mmol) and Li[Me<sub>3</sub>SiNBu<sup>t</sup>] (17 mg, 0.11 mmol) placed in an NMR tube equipped with a J. Young valve was treated with C<sub>6</sub>D<sub>6</sub> (0.7 mL). The sample was heated at 60 °C, shaken periodically, and monitored by <sup>1</sup>H NMR spectroscopy, thereby indicating the formation of *cis*-W(CO)<sub>4</sub>(CNBu<sup>t</sup>)<sub>2</sub> after a period of 5 hours. The mixture was filtered through silica gel (*ca.* 1 mL) and eluted with hexanes (*ca.* 10 mL). The combined filtrate was concentrated to a volume of *ca.* 3 mL and placed at -15 °C, thereby depositing colorless crystals of *cis*-W(CO)<sub>4</sub>(CNBu<sup>t</sup>)<sub>2</sub> which were isolated and dried *in vacuo* (11 mg, 42 %). The mother liquor was placed at -15 °C, thereby depositing a second crop of colorless crystals (6 mg) composed of a *ca.* 1:3 mixture of *cis*-W(CO)<sub>4</sub>(CNBu<sup>t</sup>)<sub>2</sub> and W(CO)<sub>5</sub>(CNBu<sup>t</sup>). <sup>1</sup>H NMR (C<sub>6</sub>D<sub>6</sub>): 0.82 [s, CNC(CH<sub>3</sub>)<sub>3</sub>]. IR data (hexanes, cm<sup>-1</sup>): ν<sub>CN</sub> = 2148 (w) and 2104 (w); ν<sub>CO</sub> = 2009 (m) and 1922 (s).<sup>4</sup> Crystals suitable for X-ray diffraction were obtained from hexanes at -15 °C.

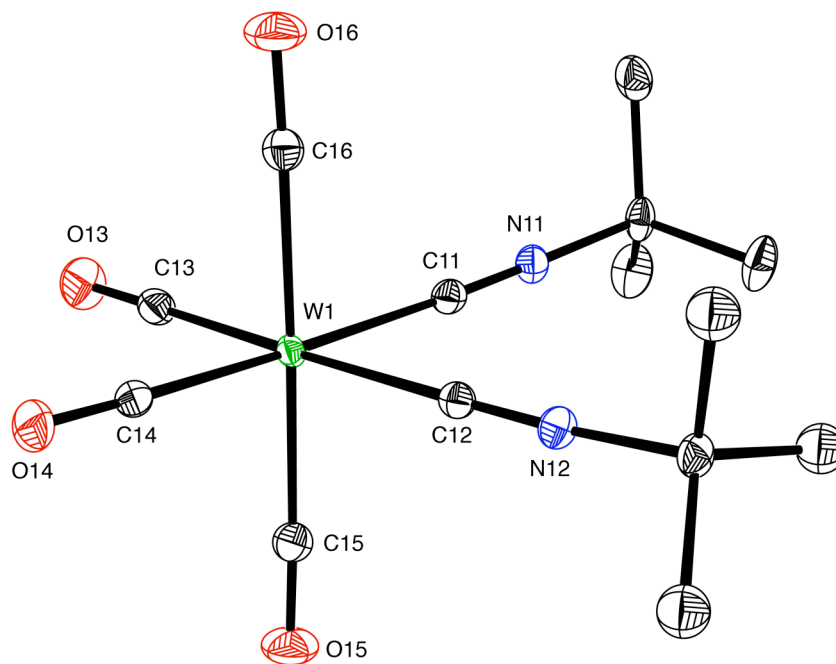

*Molecular Structure of cis*-W(CO)<sub>4</sub>(CNBu<sup>t</sup>)<sub>2</sub>

### Synthesis of *fac*-Cr(CO)<sub>3</sub>(CNBu<sup>t</sup>)<sub>3</sub>

A mixture of Cr(CO)<sub>6</sub> (12 mg, 0.05 mmol) and Li[Me<sub>3</sub>SiNBu<sup>t</sup>] (43 mg, 0.28 mmol) placed in an NMR tube equipped with a J. Young valve was treated with C<sub>6</sub>D<sub>6</sub> (0.7 mL). The

sample was heated at 60 °C, shaken periodically, and monitored by  $^1\text{H}$  NMR spectroscopy, thereby indicating the formation of *fac*-Cr(CO)<sub>3</sub>(CNBu<sup>t</sup>)<sub>3</sub> after a period of 69 hours. The mixture was filtered through silica gel (*ca.* 1 mL) and eluted with hexanes (*ca.* 10 mL). The combined filtrate was concentrated to a volume of *ca.* 3 mL and placed at -15 °C, thereby depositing pale yellow crystals of *fac*-Cr(CO)<sub>3</sub>(CNBu<sup>t</sup>)<sub>3</sub> which were isolated and dried *in vacuo* (3 mg, 14 %).  $^1\text{H}$  NMR (C<sub>6</sub>D<sub>6</sub>): 1.00 [s, CNC(CH<sub>3</sub>)<sub>3</sub>]. IR data (CH<sub>2</sub>Cl<sub>2</sub>, cm<sup>-1</sup>):  $\nu_{\text{CN}}$  = 2150 (w) and 2109 (m);  $\nu_{\text{CO}}$  = 1932 (s) and 1863 (s).<sup>4</sup>

### Synthesis of *fac*-Mo(CO)<sub>3</sub>(CNBu<sup>t</sup>)<sub>3</sub> and *cis*-Mo(CO)<sub>2</sub>(CNBu<sup>t</sup>)<sub>4</sub>

A mixture of Mo(CO)<sub>6</sub> (36 mg, 0.14 mmol) and Li[Me<sub>3</sub>SiNBu<sup>t</sup>] (70 mg, 0.46 mmol) placed in an NMR tube equipped with a J. Young valve was treated with C<sub>6</sub>D<sub>6</sub> (0.7 mL). The sample was heated at 60 °C, shaken periodically, and monitored by  $^1\text{H}$  NMR spectroscopy, thereby indicating the formation of *fac*-Mo(CO)<sub>3</sub>(CNBu<sup>t</sup>)<sub>3</sub> after a period of 3 hours, together with a small amount of *cis*-Mo(CO)<sub>4</sub>(CNBu<sup>t</sup>)<sub>2</sub>. An additional quantity of Li[Me<sub>3</sub>SiNBu<sup>t</sup>] (70 mg, 0.46 mmol) was added, and the mixture was heated at 60 °C for 1 day. The mixture was filtered through silica gel (*ca.* 1 mL) and eluted with hexanes (*ca.* 10 mL). The combined filtrate was concentrated to a volume of *ca.* 3 mL and placed at -15 °C, thereby depositing pale yellow crystals of *fac*-Mo(CO)<sub>3</sub>(CNBu<sup>t</sup>)<sub>3</sub> which were isolated and dried *in vacuo* (17 mg, 28 %) contaminated with a small amount (*ca.* 2 %) of *cis*-Mo(CO)<sub>2</sub>(CNBu<sup>t</sup>)<sub>4</sub>. The mother liquor was placed at -15 °C, thereby depositing a second crop of pale yellow crystals (9 mg) composed of a *ca.* 3:1 mixture of *fac*-Mo(CO)<sub>4</sub>(CNBu<sup>t</sup>)<sub>2</sub> and *cis*-Mo(CO)<sub>2</sub>(CNBu<sup>t</sup>)<sub>4</sub>.

*Data for fac-Mo(CO)<sub>3</sub>(CNBu<sup>t</sup>)<sub>3</sub>.*  $^1\text{H}$  NMR (C<sub>6</sub>D<sub>6</sub>): 0.95 [s, CNC(CH<sub>3</sub>)<sub>3</sub>]. IR Data (dichloromethane, cm<sup>-1</sup>):  $\nu_{\text{CN}}$  = 2154 (w) and 2114 (m);  $\nu_{\text{CO}}$  = 1935 (s) and 1861 (s).<sup>4</sup>

*Data for cis-Mo(CO)<sub>2</sub>(CNBu<sup>t</sup>)<sub>4</sub>.*  $^1\text{H}$  NMR (C<sub>6</sub>D<sub>6</sub>): 1.04 [s, CNC(CH<sub>3</sub>)<sub>3</sub>], 1.15 [s, CNC(CH<sub>3</sub>)<sub>3</sub>].

### Synthesis of *fac*-W(CO)<sub>3</sub>(CNBu<sup>t</sup>)<sub>3</sub>

A mixture of W(CO)<sub>6</sub> (20 mg, 0.06 mmol) and Li[Me<sub>3</sub>SiNBu<sup>t</sup>] (43 mg, 0.28 mmol) placed



in an NMR tube equipped with a J. Young valve was treated with  $C_6D_6$  (0.7 mL). The sample was heated at 60 °C, shaken periodically, and monitored by  $^1H$  NMR spectroscopy, thereby indicating the formation of *fac*- $W(CO)_3(CNBu^t)_3$  after a period of 22 hours. The mixture was filtered through silica gel (*ca.* 1 mL) and eluted with hexanes (*ca.* 10 mL). The combined filtrate was concentrated to a volume of *ca.* 3 mL and placed at -15 °C, thereby depositing pale yellow crystals of *fac*- $W(CO)_3(CNBu^t)_3$  which were isolated and dried *in vacuo* (21 mg, 66 %) contaminated with a small amount of *cis*- $W(CO)_2(CNBu^t)_4$  (3 %). The mother liquor was placed at -15 °C, thereby depositing a second batch of pale yellow crystals (3 mg); total yield 24 mg, 80 %.  $^1H$  NMR ( $C_6D_6$ ): 0.95 [s,  $CNC(CH_3)_3$ ]. IR Data ( $CH_2Cl_2$ ,  $cm^{-1}$ ):  $\nu_{CN} = 2155$  (w) and 2108 (m);  $\nu_{CO} = 1929$  (s) and 1857 (s).<sup>4</sup> Crystals suitable for X-ray diffraction were obtained from hexanes at -15 °C.

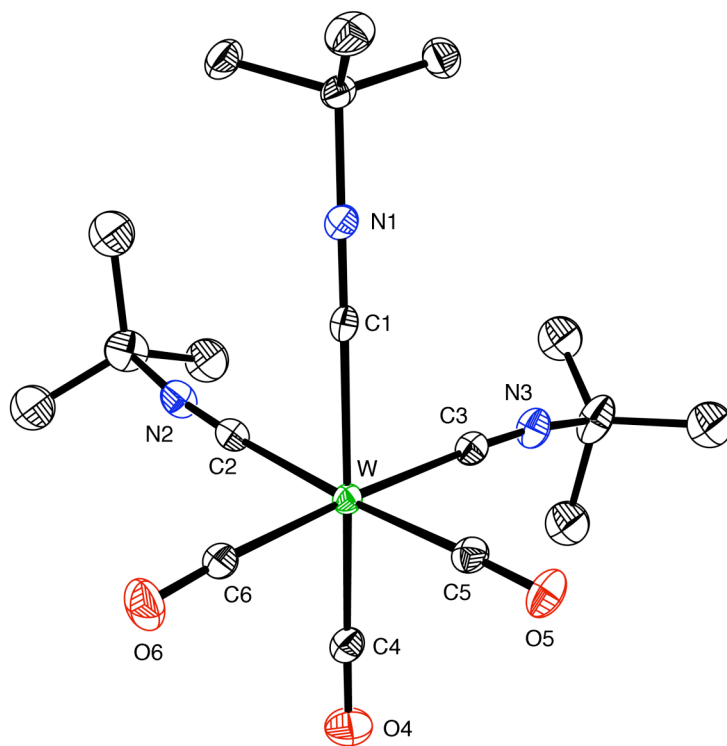

*Molecular Structure of fac-W(CO)<sub>3</sub>(CNBu<sup>t</sup>)<sub>3</sub>*

### Synthesis of *axial*- $Fe(CO)_4(CNBu^t)$

A mixture of  $Fe(CO)_5$  (10  $\mu$ L, 0.07 mmol) and  $Li[Me_3SiNBu^t]$  (11 mg, 0.07 mmol) placed

in an NMR tube equipped with a J. Young valve was treated with  $C_6D_6$  (0.7 mL). The sample was heated at  $60\text{ }^\circ\text{C}$  and monitored by  $^1\text{H}$  NMR spectroscopy, thereby indicating the formation of *axial*- $Fe(CO)_4(CNBut^t)$  after a period of 20 minutes. The mixture was filtered through silica gel (*ca.* 1 mL) and eluted with hexanes (*ca.* 10 mL). The combined filtrate was concentrated to a volume of *ca.* 3 mL and placed at  $-15\text{ }^\circ\text{C}$ , thereby depositing colorless crystals of *axial*- $Fe(CO)_4(CNBut^t)$  which were isolated and dried *in vacuo* (9 mg, 48 %) contaminated with a small amount of *trans*- $Fe(CO)_3(CNBut^t)_2$  (< 2 %).  $^1\text{H}$  NMR ( $C_6D_6$ ): 0.66 [s,  $CNC(CH_3)_3$ ]. IR data (hexanes,  $cm^{-1}$ ):  $\nu_{CN} = 2171$  (w);  $\nu_{CO} = 2055$  (m), 1993 (m) and 1967 (s).<sup>6</sup> Crystals suitable for X-ray diffraction were obtained from hexanes at  $-15\text{ }^\circ\text{C}$ .

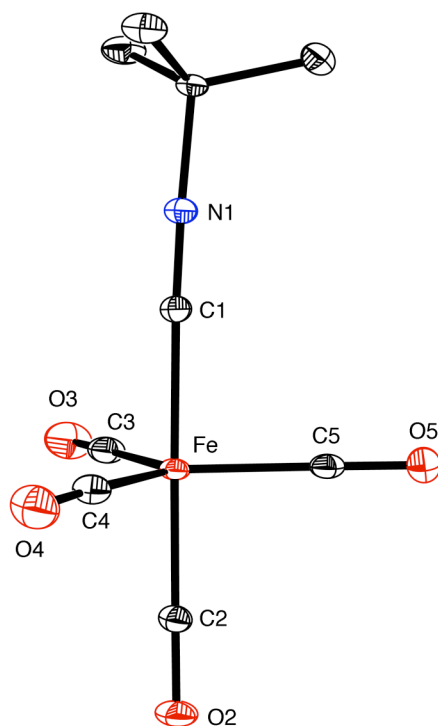

*Molecular Structure of  $Fe(CO)_4(CNBut^t)$*

**Synthesis of *trans*- $Fe(CO)_3(CNBut^t)_2$**  (a) A mixture of  $Fe(CO)_5$  (10  $\mu\text{L}$ , 0.07 mmol) and  $Li[Me_3SiNBut^t]$  (25 mg, 0.16 mmol) placed in an NMR tube equipped with a J. Young valve was treated with  $C_6D_6$  (0.7 mL). The sample was heated at  $60\text{ }^\circ\text{C}$  and monitored by  $^1\text{H}$  NMR spectroscopy, The sample was monitored by  $^1\text{H}$  NMR spectroscopy,

thereby indicating the formation of *trans*-Fe(CO)<sub>3</sub>(CNBu<sup>t</sup>)<sub>2</sub> after a period of 16 hours. The mixture was filtered through silica gel (*ca.* 1 mL) and eluted with hexanes (*ca.* 10 mL) and then dichloromethane (*ca.* 5 mL). The combined filtrate was concentrated to a volume of *ca.* 3 mL and placed at -15 °C, thereby depositing colorless crystals of *trans*-Fe(CO)<sub>3</sub>(CNBu<sup>t</sup>)<sub>2</sub> which were isolated and dried *in vacuo* (14 mg, 62 %). <sup>1</sup>H NMR (C<sub>6</sub>D<sub>6</sub>): 0.82 [s, CNC(CH<sub>3</sub>)<sub>3</sub>]. IR data (hexanes, cm<sup>-1</sup>): ν<sub>CN</sub> = 2116 (m); ν<sub>CO</sub> = 1996 (w) and 1933 (s).<sup>6</sup> Crystals suitable for X-ray diffraction were obtained from hexanes at -15 °C.<sup>7</sup>

(b) A suspension of Li[Me<sub>3</sub>SiNBu<sup>t</sup>] (2.00 g, 13.22 mmol) in Et<sub>2</sub>O (30 mL) was treated with Fe(CO)<sub>5</sub> (0.812 mL, 1.177 g, 6.01 mmol) at -78 °C. The mixture was stirred and allowed to warm to room temperature. After 16 hours, an additional quantity of Li[Me<sub>3</sub>SiNBu<sup>t</sup>] (600 mg, 3.97 mmol) was added at -78 °C. The mixture was allowed to warm to room temperature and stirred for 16 hours. After this period, the volatile components were removed *in vacuo*. Hexanes (*ca.* 10 mL) were added and the mixture was filtered through silica gel (*ca.* 25 mL) and eluted with hexanes (*ca.* 200 mL); *caution* – the dry residue on the column may be pyrophoric. The filtrate was placed at -78 °C, thereby depositing pale yellow crystals of *trans*-Fe(CO)<sub>3</sub>(CNBu<sup>t</sup>)<sub>2</sub> which were isolated and dried *in vacuo* (906 mg, 49 %).

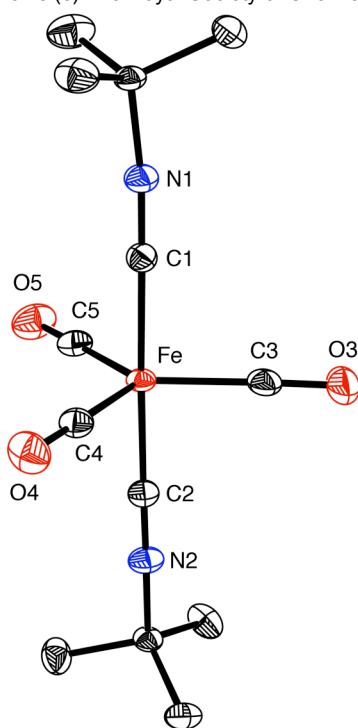

*Molecular Structure of Fe(CO)<sub>3</sub>(CNBu<sup>t</sup>)<sub>2</sub>*

### Synthesis of Mo(CO)<sub>5</sub>(CN-1-Np<sup>H4</sup>)

Me<sub>3</sub>SiCl (190 μL, 1.5 mmol) was added to a solution of (*R*)-1,2,3,4-tetrahydro-1-naphthylamine (200 μL, 1.36 mmol) in Et<sub>2</sub>O (*ca.* 10 mL) and the resulting suspension was stirred for 30 minutes at room temperature, and then treated in a dropwise manner with a solution of Bu<sup>n</sup>Li in hexanes (1.6 M, 1.9 mL, 3.0 mmol). The suspension was stirred overnight at room temperature, cooled to -78 °C, and treated with Mo(CO)<sub>6</sub> (180 mg, 0.68 mmol). The suspension was allowed to warm to room temperature and stirred for 6 hours. After this period, the volatile components were removed *in vacuo* and the residue obtained was extracted into hexanes (*ca.* 20 mL), filtered through silica gel (*ca.* 8 mL) and eluted with hexanes (*ca.* 75 mL) to give Mo(CO)<sub>5</sub>(CN-1-Np<sup>H4</sup>) as a microcrystalline solid (105 mg, 39 %). <sup>1</sup>H NMR (C<sub>6</sub>D<sub>6</sub>): 1.07 – 1.44 [several multiplets, 4H, C<sub>6</sub>H<sub>4</sub>C<sub>3</sub>H<sub>6</sub>CH(NC)], 2.09 – 2.27 [m, 2H C<sub>6</sub>H<sub>4</sub>C<sub>3</sub>H<sub>6</sub>CH(NC)], 3.98 [t, <sup>3</sup>J<sub>H-H</sub> = 5, 1H, C<sub>6</sub>H<sub>4</sub>C<sub>3</sub>H<sub>6</sub>CH(NC)], 6.69 [m, 1H, C<sub>6</sub>H<sub>4</sub>C<sub>3</sub>H<sub>6</sub>CH(NC)], 6.92 [m, 2H, C<sub>6</sub>H<sub>4</sub>C<sub>3</sub>H<sub>6</sub>CH(NC)], 7.05 [m, 1H, C<sub>6</sub>H<sub>4</sub>C<sub>3</sub>H<sub>6</sub>CH(NC)]. <sup>13</sup>C{<sup>1</sup>H} NMR (C<sub>6</sub>D<sub>6</sub>): 19.3 [s, 1C, C<sub>6</sub>H<sub>4</sub>C<sub>3</sub>H<sub>6</sub>CH(NC)],

28.2 [s, 1C, C<sub>6</sub>H<sub>4</sub>C<sub>3</sub>H<sub>6</sub>CH(NC)], 30.2 [s, 1C, C<sub>6</sub>H<sub>4</sub>C<sub>3</sub>H<sub>6</sub>CH(NC)], 55.1 [s, 1C, C<sub>6</sub>H<sub>4</sub>C<sub>3</sub>H<sub>6</sub>CH(NC)], 126.9 [s, 1C, C<sub>6</sub>H<sub>4</sub>C<sub>3</sub>H<sub>6</sub>CH(NC)], 128.0 [s, 1C, C<sub>6</sub>H<sub>4</sub>C<sub>3</sub>H<sub>6</sub>CH(NC)], 128.8 [s, 1C, C<sub>6</sub>H<sub>4</sub>C<sub>3</sub>H<sub>6</sub>CH(NC)], 129.7 [s, 1C, C<sub>6</sub>H<sub>4</sub>C<sub>3</sub>H<sub>6</sub>CH(NC)], 131.6 [s, 1C, C<sub>6</sub>H<sub>4</sub>C<sub>3</sub>H<sub>6</sub>CH(NC)], 136.3 [s, 1C, C<sub>6</sub>H<sub>4</sub>C<sub>3</sub>H<sub>6</sub>CH(NC)], 152.9 [s, 1C, C<sub>6</sub>H<sub>4</sub>C<sub>3</sub>H<sub>6</sub>CH(NC)], 204.4 [s, 4C Mo(CO)<sub>5</sub>], 207.1 [s, 1C Mo(CO)<sub>5</sub>]. IR data (Hexanes, cm<sup>-1</sup>): ν<sub>CN</sub> = 2154 (m); ν<sub>CO</sub> = 2066 (m), 1960 (s) and 1929 (w). Crystals suitable for X-ray diffraction were obtained from hexanes at -15 °C.

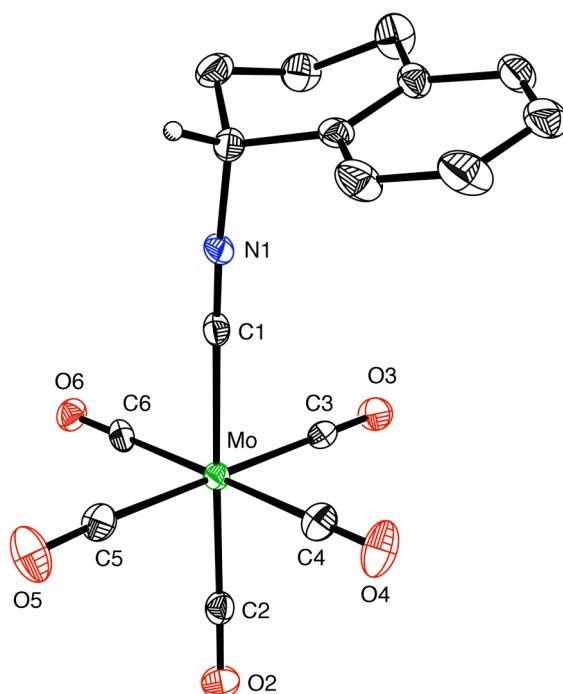

*Molecular Structure of Mo(CO)<sub>5</sub>(CN-1-Np<sup>H4</sup>)*

### Synthesis of Mo(CO)<sub>5</sub>(CN-1-Adamantyl) and *cis*-Mo(CO)<sub>4</sub>(CN-1-Adamantyl)<sub>2</sub>

Me<sub>3</sub>SiCl (100 μL, 0.79 mmol) was added to a suspension of 1-adamantamine, AdNH<sub>2</sub>, (70 mg, 0.46 mmol) in Et<sub>2</sub>O (*ca.* 10 mL). The suspension was stirred for 30 minutes, cooled to -78 °C, and treated in a dropwise manner with a solution of Bu<sup>n</sup>Li in hexanes (2.5 M, 0.40 mL, 1.00 mmol). The resulting solution was allowed to warm to room temperature, thereby depositing a white precipitate. The mixture was stirred for 3 hours at room temperature, cooled to -78 °C, and was treated with Mo(CO)<sub>6</sub> (50 mg, 0.19 mmol). The suspension was allowed to warm to room temperature and was stirred

overnight. After this period, the volatile components were removed *in vacuo* and the residue obtained was extracted into hexanes (*ca.* 3 mL) and purified by flash chromatography (silica, hexanes, Et<sub>2</sub>O gradient). Mo(CO)<sub>5</sub>(CN-1-Ad) was the first fraction (24 mg, 32 % based on Mo(CO)<sub>6</sub>) and *cis*-Mo(CO)<sub>4</sub>(CN-1-Ad)<sub>2</sub> (43 mg, 43 %) was obtained as the second fraction. Crystals of Mo(CO)<sub>5</sub>(CN-1-Ad) and Mo(CO)<sub>4</sub>(CN-1-Ad)<sub>2</sub> suitable for X-ray diffraction were obtained from hexanes at -15 °C.

*Data for Mo(CO)<sub>5</sub>(CN-1-Ad)*

<sup>1</sup>H NMR (C<sub>6</sub>D<sub>6</sub>): 1.12 [m, 6H of Ad], 1.40 [s, 6H of Ad], 1.50 [s, 3H of Ad]. IR data (hexanes, cm<sup>-1</sup>): ν<sub>CN</sub> = 2147 (m); ν<sub>CO</sub> = 2065 (m), 1958 (s), and 1930 (w). Mass spectrum (FAB+): *m/z* = 399.0 {M}<sup>+</sup>.

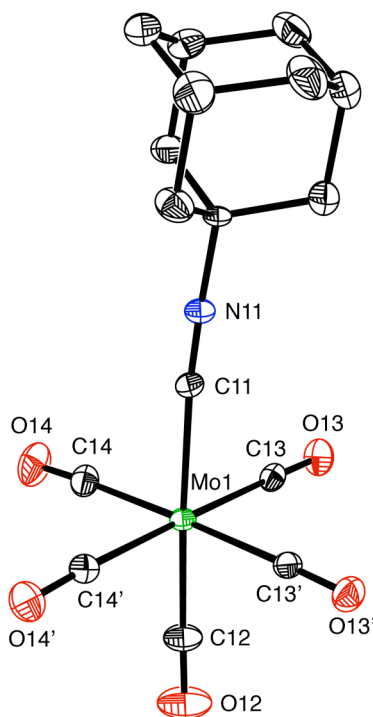

*Molecular Structure of Mo(CO)<sub>5</sub>(CN-1-Ad)*

*Data for cis-Mo(CO)<sub>4</sub>(CN-1-Ad)<sub>2</sub>*

<sup>1</sup>H NMR (C<sub>6</sub>D<sub>6</sub>): 1.18 [m, 6H of Ad], 1.57 [s, 3H of Ad], 1.60 [s, 6H of Ad]. IR data (Et<sub>2</sub>O, cm<sup>-1</sup>): ν<sub>CN</sub> = 2147 (w) and ν<sub>CN</sub> = 2115 (m); ν<sub>CO</sub> = 2016 (m) and 1928 (s). Mass spectrum (FAB+): *m/z* = 532.2 {M}<sup>+</sup>.

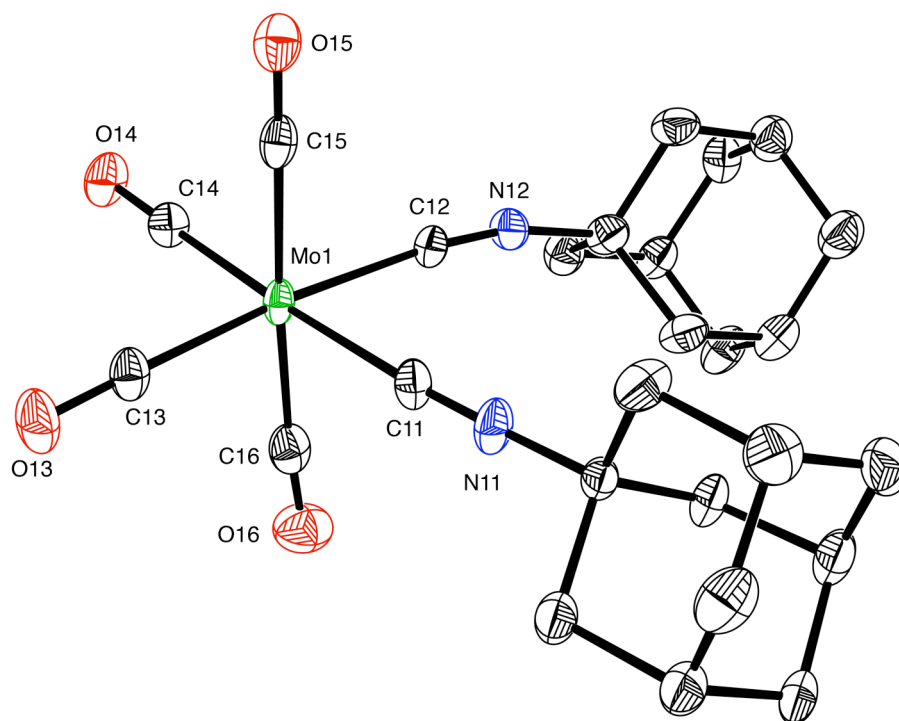

*Molecular Structure of cis-Mo(CO)<sub>4</sub>(CN-1-Ad)<sub>2</sub>*

### Synthesis of Mo(CO)<sub>5</sub>(CN-*p*-C<sub>6</sub>H<sub>4</sub>Me)

Me<sub>3</sub>SiCl (100  $\mu$ L, 0.79 mmol) was added to a solution of *p*-MeC<sub>6</sub>H<sub>4</sub>NH<sub>2</sub> (20 mg, 0.19 mmol) in Et<sub>2</sub>O (*ca.* 10 mL) giving a suspension that was stirred for 2 hours, cooled to  $-78$   $^{\circ}$ C, and treated in a dropwise manner with a solution of Bu<sup>n</sup>Li in hexanes (2.5 M, 0.17 mL, 0.42 mmol). The resulting solution was allowed to warm to room temperature, thereby depositing a white precipitate. The mixture was stirred for 4 hours at room temperature, cooled to  $-78$   $^{\circ}$ C, and treated with Mo(CO)<sub>6</sub> (50 mg, 0.19 mmol). The mixture was allowed to warm to room temperature and was stirred for 2 days. The volatile components were removed *in vacuo* and the residue obtained was extracted into hexanes (*ca.* 5 mL) and purified by flash column chromatography (silica gel, hexanes), to give Mo(CO)<sub>5</sub>(CN-*p*-C<sub>6</sub>H<sub>4</sub>Me) as a white microcrystalline solid (47 mg, 70 %). <sup>1</sup>H NMR (C<sub>6</sub>D<sub>6</sub>): 1.79 [s, 3H, CN-*p*-C<sub>6</sub>H<sub>4</sub>CH<sub>3</sub>], 6.46 [s, 4H, CN-*p*-C<sub>6</sub>H<sub>4</sub>Me]. IR data (hexanes, cm<sup>-1</sup>):  $\nu_{\text{CN}}$  = 2137 (w);  $\nu_{\text{CO}}$  = 2059 (m), 1965 (s) and 1930 (w). Mass spectrum

(FAB+):  $m/z = 355.0 \{M\}^+$ .

### Synthesis of $\text{Mo}(\text{CO})_5(\text{CN-}p\text{-C}_6\text{H}_4\text{OMe})$

$\text{Me}_3\text{SiCl}$  (100  $\mu\text{L}$ , 0.79 mmol) was added to a solution of  $p\text{-MeOC}_6\text{H}_4\text{NH}_2$  (23 mg, 0.19 mmol) in  $\text{Et}_2\text{O}$  (ca. 10 mL) and stirred for 30 minutes at room temperature. The mixture was cooled to  $-78\text{ }^\circ\text{C}$  and treated in a dropwise manner with a solution of  $\text{Bu}^n\text{Li}$  in hexanes (2.5 M, 0.17 mL, 0.42 mmol). The resulting solution was allowed to warm to room temperature, thereby depositing a white precipitate. The mixture was stirred for 2 hours at room temperature, cooled to  $-78\text{ }^\circ\text{C}$ , and treated with  $\text{Mo}(\text{CO})_6$  (50 mg, 0.19 mmol). The mixture was allowed to warm to room temperature and was stirred overnight. After this period, the volatile components were removed *in vacuo* and the residue obtained was extracted into hexanes (ca. 5 mL) and purified by flash column chromatography (silica gel, hexanes) to give  $\text{Mo}(\text{CO})_5(\text{CN-}p\text{-C}_6\text{H}_4\text{OMe})$  as a microcrystalline solid (56 mg, 80 %).  $^1\text{H NMR}$  ( $\text{C}_6\text{D}_6$ ): 3.03 [s, 3H,  $\text{CN-}p\text{-C}_6\text{H}_4\text{OCH}_3$ ], 6.24 [d,  $^3J_{\text{H-H}} = 9\text{ Hz}$ , 2H,  $\text{CN-}p\text{-C}_6\text{H}_4\text{OCH}_3$ ], 6.49 [d,  $^3J_{\text{H-H}} = 9\text{ Hz}$ , 2H,  $\text{CN-}p\text{-C}_6\text{H}_4\text{OCH}_3$ ]. IR data (hexanes,  $\text{cm}^{-1}$ ):  $\nu_{\text{CN}} = 2137$  (m);  $\nu_{\text{CO}} = 2059$  (m), 1964 (s) and 1942 (w). Mass spectrum (FAB+):  $m/z = 371.0 \{M\}^+$ . Crystals suitable for X-ray diffraction were obtained from hexanes at  $-15\text{ }^\circ\text{C}$ .



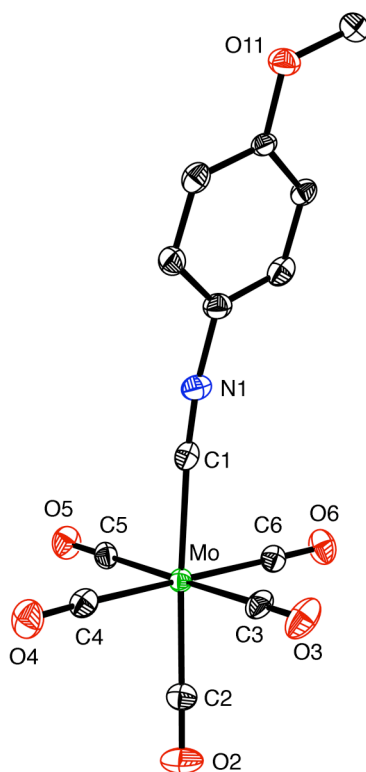

*Molecular Structure of Mo(CO)<sub>5</sub>(CN-*p*-C<sub>6</sub>H<sub>4</sub>OMe)*

### Synthesis of *cis*-Mo(CO)<sub>4</sub>(CN-2,4,6-C<sub>6</sub>H<sub>2</sub>Me<sub>3</sub>)<sub>2</sub>

A solution of Bu<sup>n</sup>Li in hexanes (2.5 M, 0.2 mL, 0.5 mmol) was added to a solution of 2,4,6-trimethylaniline (60  $\mu$ L, 0.43 mmol) in Et<sub>2</sub>O (*ca.* 10 mL). The solution was stirred at room temperature for 2 hours and then cooled to  $-78$  °C, thereby depositing a white precipitate. Me<sub>3</sub>SiCl was added dropwise and the mixture was allowed to warm to room temperature, during which period it became a solution and then a suspension. The resulting suspension was allowed to stir for 1 hour at room temperature. After this period, the mixture was treated with a solution of Bu<sup>n</sup>Li in hexanes (2.5 M, 0.2 mL, 0.5 mmol). The suspension was stirred for 1 hour, cooled to  $-78$  °C and then treated with Mo(CO)<sub>6</sub> (50 mg, 0.19 mmol). The mixture was allowed to warm to room temperature and then stirred for 2 days at 60 °C. After this period, the volatile components were removed *in vacuo* and the residue obtained was extracted into hexanes (*ca.* 3 mL) and purified by flash chromatography (silica, hexanes, Et<sub>2</sub>O gradient) to give Mo(CO)<sub>4</sub>(CN-2,4,6-C<sub>6</sub>H<sub>2</sub>Me<sub>3</sub>)<sub>2</sub> (46 mg, 49 %) as a white microcrystalline solid. <sup>1</sup>H NMR (C<sub>6</sub>D<sub>6</sub>): 1.90 [s,

3H, CN-2,4,6-C<sub>6</sub>H<sub>2</sub>(CH<sub>3</sub>)<sub>3</sub>], 2.09 [s, 6H, CN-2,4,6-C<sub>6</sub>H<sub>2</sub>(CH<sub>3</sub>)<sub>3</sub>], 6.39 [s, 2H, CN-2,4,6-C<sub>6</sub>H<sub>2</sub>Me<sub>3</sub>]. IR data (hexanes, cm<sup>-1</sup>):  $\nu_{\text{CN}} = 2131$  (w) and  $\nu_{\text{CN}} = 2079$  (m);  $\nu_{\text{CO}} = 2013$  (m) and  $1940$  (s). Mass spectrum (FAB+):  $m/z = 500.1$  {M}<sup>+</sup>. Crystals suitable for X-ray diffraction were obtained from hexanes at -15 °C.

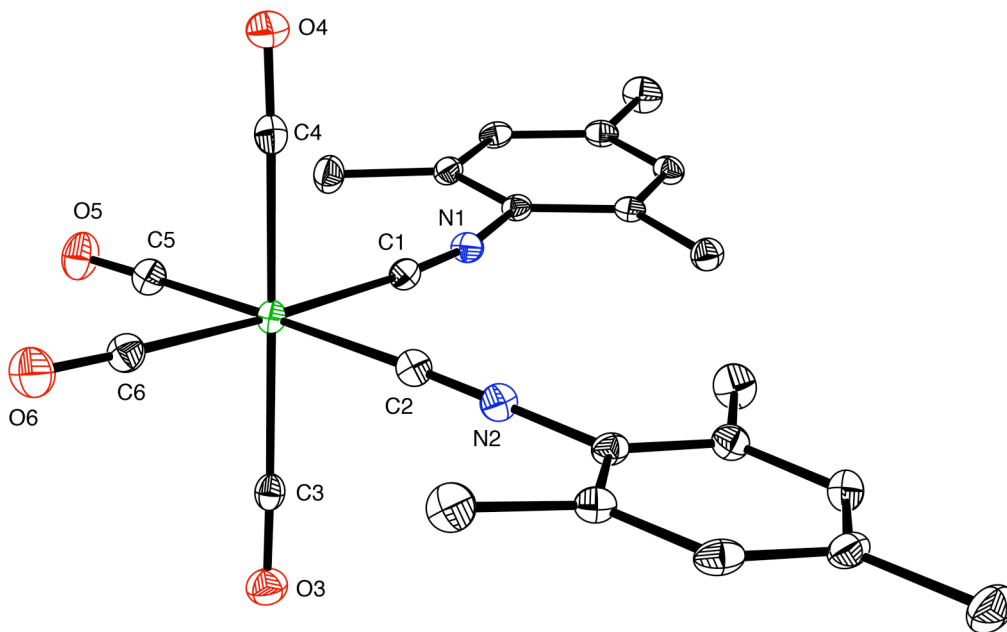

*Molecular Structure of cis-Mo(CO)<sub>4</sub>(CN-2,4,6-C<sub>6</sub>H<sub>2</sub>Me<sub>3</sub>)<sub>2</sub>*

**Table 1.** Crystal, intensity collection and refinement data.

|                                          | <b>Cr(CO)<sub>5</sub>(CNBu<sup>t</sup>)</b>      | <b>Cr(CO)<sub>4</sub>(CNBu<sup>t</sup>)<sub>2</sub></b>         |
|------------------------------------------|--------------------------------------------------|-----------------------------------------------------------------|
| lattice                                  | Monoclinic                                       | Monoclinic                                                      |
| formula                                  | C <sub>10</sub> H <sub>9</sub> CrNO <sub>5</sub> | C <sub>14</sub> H <sub>18</sub> CrN <sub>2</sub> O <sub>4</sub> |
| formula weight                           | 275.18                                           | 330.30                                                          |
| space group                              | <i>P2<sub>1</sub>/c</i>                          | <i>P2<sub>1</sub>/c</i>                                         |
| <i>a</i> /Å                              | 9.1589(12)                                       | 17.0086(16)                                                     |
| <i>b</i> /Å                              | 15.059(2)                                        | 11.1264(10)                                                     |
| <i>c</i> /Å                              | 9.3824(12)                                       | 18.3223(17)                                                     |
| $\alpha$ /°                              | 90                                               | 90                                                              |
| $\beta$ /°                               | 103.357(2)                                       | 101.7850(10)                                                    |
| $\gamma$ /°                              | 90                                               | 90                                                              |
| <i>V</i> /Å <sup>3</sup>                 | 1259.1(3)                                        | 3394.3(5)                                                       |
| <i>Z</i>                                 | 4                                                | 8                                                               |
| temperature (K)                          | 125(2)                                           | 125(2)                                                          |
| radiation ( $\lambda$ , Å)               | 0.71073                                          | 0.71073                                                         |
| $\rho$ (calcd.), g cm <sup>-3</sup>      | 1.452                                            | 1.293                                                           |
| $\mu$ (Mo K $\alpha$ ), mm <sup>-1</sup> | 0.916                                            | 0.689                                                           |
| $\theta$ max, deg.                       | 30.49                                            | 30.53                                                           |
| no. of data collected                    | 20007                                            | 53504                                                           |
| no. of data used                         | 3833                                             | 10369                                                           |
| no. of parameters                        | 157                                              | 401                                                             |
| $R_1$ [ $I > 2\sigma(I)$ ]               | 0.0403                                           | 0.0400                                                          |
| $wR_2$ [ $I > 2\sigma(I)$ ]              | 0.0811                                           | 0.0849                                                          |
| $R_1$ [all data]                         | 0.0738                                           | 0.0746                                                          |
| $wR_2$ [all data]                        | 0.0926                                           | 0.0849                                                          |
| GOF                                      | 1.009                                            | 1.004                                                           |

**Table 1(cont).** Crystal, intensity collection and refinement data.

|                                                     | <b>Mo(CO)<sub>4</sub>(CNBu<sup>t</sup>)<sub>2</sub></b>         | <b>W(CO)<sub>4</sub>(CNBu<sup>t</sup>)<sub>2</sub></b>         |
|-----------------------------------------------------|-----------------------------------------------------------------|----------------------------------------------------------------|
| lattice                                             | Monoclinic                                                      | Monoclinic                                                     |
| formula                                             | C <sub>14</sub> H <sub>18</sub> MoN <sub>2</sub> O <sub>4</sub> | C <sub>14</sub> H <sub>18</sub> WN <sub>2</sub> O <sub>4</sub> |
| formula weight                                      | 374.24                                                          | 462.15                                                         |
| space group                                         | <i>P</i> 2 <sub>1</sub> / <i>c</i>                              | <i>P</i> 2 <sub>1</sub> / <i>c</i>                             |
| <i>a</i> /Å                                         | 17.2165(10)                                                     | 17.109(10)                                                     |
| <i>b</i> /Å                                         | 11.2053(7)                                                      | 11.131(7)                                                      |
| <i>c</i> /Å                                         | 18.6121(11)                                                     | 18.487(11)                                                     |
| α/°                                                 | 90                                                              | 90                                                             |
| β/°                                                 | 101.2930(10)                                                    | 101.259(8)                                                     |
| γ/°                                                 | 90                                                              | 90                                                             |
| <i>V</i> /Å <sup>3</sup>                            | 3521.1(4)                                                       | 3453(4)                                                        |
| <i>Z</i>                                            | 8                                                               | 8                                                              |
| temperature (K)                                     | 125(2)                                                          | 125(2)                                                         |
| radiation (λ, Å)                                    | 0.71073                                                         | 0.71073                                                        |
| ρ (calcd.), g cm <sup>-3</sup>                      | 1.412                                                           | 1.778                                                          |
| μ (Mo Kα), mm <sup>-1</sup>                         | 0.759                                                           | 6.706                                                          |
| θ max, deg.                                         | 30.35                                                           | 32.94                                                          |
| no. of data collected                               | 55011                                                           | 59772                                                          |
| no. of data used                                    | 10593                                                           | 12348                                                          |
| no. of parameters                                   | 401                                                             | 401                                                            |
| <i>R</i> <sub>1</sub> [ <i>I</i> > 2σ( <i>I</i> )]  | 0.0393                                                          | 0.0239                                                         |
| <i>wR</i> <sub>2</sub> [ <i>I</i> > 2σ( <i>I</i> )] | 0.0696                                                          | 0.0437                                                         |
| <i>R</i> <sub>1</sub> [all data]                    | 0.0741                                                          | 0.0373                                                         |
| <i>wR</i> <sub>2</sub> [all data]                   | 0.0806                                                          | 0.0471                                                         |
| GOF                                                 | 1.001                                                           | 1.008                                                          |

**Table 1(cont).** Crystal, intensity collection and refinement data.

|                                                     | <b>W(CO)<sub>3</sub>(CNBu<sup>t</sup>)<sub>3</sub></b>         | <b>Fe(CO)<sub>4</sub>(CNBu<sup>t</sup>)</b>     |
|-----------------------------------------------------|----------------------------------------------------------------|-------------------------------------------------|
| lattice                                             | Monoclinic                                                     | Monoclinic                                      |
| formula                                             | C <sub>18</sub> H <sub>27</sub> WN <sub>3</sub> O <sub>3</sub> | C <sub>9</sub> H <sub>9</sub> FeNO <sub>4</sub> |
| formula weight                                      | 517.28                                                         | 251.02                                          |
| space group                                         | <i>P</i> 2 <sub>1</sub> / <i>c</i>                             | <i>P</i> 2 <sub>1</sub> / <i>c</i>              |
| <i>a</i> /Å                                         | 9.2308(12)                                                     | 8.9045(4)                                       |
| <i>b</i> /Å                                         | 14.955(2)                                                      | 14.4203(6)                                      |
| <i>c</i> /Å                                         | 16.648(2)                                                      | 9.0702(4)                                       |
| α/°                                                 | 90                                                             | 90                                              |
| β/°                                                 | 94.987(2)                                                      | 102.7840(10)                                    |
| γ/°                                                 | 90                                                             | 90                                              |
| <i>V</i> /Å <sup>3</sup>                            | 2289.6(5)                                                      | 1135.79(9)                                      |
| <i>Z</i>                                            | 4                                                              | 4                                               |
| temperature (K)                                     | 125(2)                                                         | 125(2)                                          |
| radiation (λ, Å)                                    | 0.71073                                                        | 0.71073                                         |
| ρ (calcd.), g cm <sup>-3</sup>                      | 1.501                                                          | 1.468                                           |
| μ (Mo Kα), mm <sup>-1</sup>                         | 5.063                                                          | 1.320                                           |
| θ max, deg.                                         | 30.85                                                          | 32.60                                           |
| no. of data collected                               | 37064                                                          | 18983                                           |
| no. of data used                                    | 7183                                                           | 3954                                            |
| no. of parameters                                   | 227                                                            | 139                                             |
| <i>R</i> <sub>1</sub> [ <i>I</i> > 2σ( <i>I</i> )]  | 0.0390                                                         | 0.0236                                          |
| <i>wR</i> <sub>2</sub> [ <i>I</i> > 2σ( <i>I</i> )] | 0.0711                                                         | 0.0618                                          |
| <i>R</i> <sub>1</sub> [all data]                    | 0.0764                                                         | 0.0282                                          |
| <i>wR</i> <sub>2</sub> [all data]                   | 0.0815                                                         | 0.0651                                          |
| GOF                                                 | 0.992                                                          | 1.052                                           |

**Table 1(cont).** Crystal, intensity collection and refinement data.

|                                          | <b>Fe(CO)<sub>3</sub>(CNBu<sup>t</sup>)<sub>2</sub></b>         | <b>Mo(CO)<sub>5</sub>-<br/>(CN-<i>p</i>-C<sub>6</sub>H<sub>4</sub>OMe)</b> |
|------------------------------------------|-----------------------------------------------------------------|----------------------------------------------------------------------------|
| lattice                                  | Orthorhombic                                                    | Monoclinic                                                                 |
| formula                                  | C <sub>13</sub> H <sub>18</sub> FeN <sub>2</sub> O <sub>3</sub> | C <sub>13</sub> H <sub>7</sub> MoNO <sub>6</sub>                           |
| formula weight                           | 306.14                                                          | 369.14                                                                     |
| space group                              | <i>Pbca</i>                                                     | <i>P2<sub>1</sub></i>                                                      |
| <i>a</i> /Å                              | 11.6817(9)                                                      | 10.8089(18)                                                                |
| <i>b</i> /Å                              | 16.0996(13)                                                     | 5.8009(10)                                                                 |
| <i>c</i> /Å                              | 16.4104(13)                                                     | 11.831(2)                                                                  |
| $\alpha$ /°                              | 90                                                              | 90                                                                         |
| $\beta$ /°                               | 90                                                              | 107.521(2)                                                                 |
| $\gamma$ /°                              | 90                                                              | 90                                                                         |
| <i>V</i> /Å <sup>3</sup>                 | 3086.3(4)                                                       | 707.4(2)                                                                   |
| <i>Z</i>                                 | 8                                                               | 2                                                                          |
| temperature (K)                          | 125(2)                                                          | 125(2)                                                                     |
| radiation ( $\lambda$ , Å)               | 0.71073                                                         | 0.71073                                                                    |
| $\rho$ (calcd.), g cm <sup>-3</sup>      | 1.318                                                           | 1.733                                                                      |
| $\mu$ (Mo K $\alpha$ ), mm <sup>-1</sup> | 0.982                                                           | 0.952                                                                      |
| $\theta$ max, deg.                       | 32.65                                                           | 32.51                                                                      |
| no. of data collected                    | 50292                                                           | 11852                                                                      |
| no. of data used                         | 5476                                                            | 4735                                                                       |
| no. of parameters                        | 178                                                             | 192                                                                        |
| $R_1$ [ $I > 2\sigma(I)$ ]               | 0.0226                                                          | 0.0359                                                                     |
| $wR_2$ [ $I > 2\sigma(I)$ ]              | 0.0611                                                          | 0.0751                                                                     |
| $R_1$ [all data]                         | 0.0280                                                          | 0.0463                                                                     |
| $wR_2$ [all data]                        | 0.0652                                                          | 0.0789                                                                     |
| GOF                                      | 1.045                                                           | 1.005                                                                      |

**Table 1(cont).** Crystal, intensity collection and refinement data.

|                                                              | <b>Mo(CO)<sub>4</sub>(CN-2,4,6-<br/>C<sub>6</sub>H<sub>2</sub>Me<sub>3</sub>)<sub>2</sub></b> | <b>Mo(CO)<sub>5</sub>(CN-1-Np<sup>H<sub>4</sub></sup>)</b> |
|--------------------------------------------------------------|-----------------------------------------------------------------------------------------------|------------------------------------------------------------|
| lattice                                                      | Triclinic                                                                                     | Orthorhombic                                               |
| formula                                                      | C <sub>24</sub> H <sub>22</sub> MoN <sub>2</sub> O <sub>4</sub>                               | C <sub>16</sub> H <sub>11</sub> MoNO <sub>5</sub>          |
| formula weight                                               | 498.38                                                                                        | 393.20                                                     |
| space group                                                  | <i>P</i> -1                                                                                   | <i>P</i> 2 <sub>1</sub> 2 <sub>1</sub> 2 <sub>1</sub>      |
| <i>a</i> /Å                                                  | 10.3163(11)                                                                                   | 23.215(17)                                                 |
| <i>b</i> /Å                                                  | 10.5038(11)                                                                                   | 12.599(9)                                                  |
| <i>c</i> /Å                                                  | 11.9238(12)                                                                                   | 5.648(4)                                                   |
| $\alpha$ /°                                                  | 87.101(2)                                                                                     | 90                                                         |
| $\beta$ /°                                                   | 82.733(2)                                                                                     | 90                                                         |
| $\gamma$ /°                                                  | 63.7150(10)                                                                                   | 90                                                         |
| <i>V</i> /Å <sup>3</sup>                                     | 1149.1(2)                                                                                     | 1652(2)                                                    |
| <i>Z</i>                                                     | 2                                                                                             | 4                                                          |
| temperature (K)                                              | 125(2)                                                                                        | 200(2)                                                     |
| radiation ( $\lambda$ , Å)                                   | 0.71073                                                                                       | 0.71073                                                    |
| $\rho$ (calcd.), g cm <sup>-3</sup>                          | 1.440                                                                                         | 1.581                                                      |
| $\mu$ (Mo K $\alpha$ ), mm <sup>-1</sup>                     | 0.602                                                                                         | 0.817                                                      |
| $\theta$ max, deg.                                           | 32.65                                                                                         | 28.28                                                      |
| no. of data collected                                        | 19899                                                                                         | 15546                                                      |
| no. of data used                                             | 7821                                                                                          | 4090                                                       |
| no. of parameters                                            | 286                                                                                           | 209                                                        |
| <i>R</i> <sub>1</sub> [ <i>I</i> > 2 $\sigma$ ( <i>I</i> )]  | 0.0367                                                                                        | 0.0411                                                     |
| <i>wR</i> <sub>2</sub> [ <i>I</i> > 2 $\sigma$ ( <i>I</i> )] | 0.0839                                                                                        | 0.0674                                                     |
| <i>R</i> <sub>1</sub> [all data]                             | 0.0518                                                                                        | 0.1018                                                     |
| <i>wR</i> <sub>2</sub> [all data]                            | 0.0907                                                                                        | 0.0912                                                     |
| GOF                                                          | 1.027                                                                                         | 1.037                                                      |

**Table 1(cont).** Crystal, intensity collection and refinement data.

|                                          | <b>Mo(CO)<sub>5</sub>(CN-1-Ad)</b>                | <b>Mo(CO)<sub>4</sub>(CN-1-A)<sub>2</sub></b>                   |
|------------------------------------------|---------------------------------------------------|-----------------------------------------------------------------|
| lattice                                  | Orthorhombic                                      | Triclinic                                                       |
| formula                                  | C <sub>16</sub> H <sub>14</sub> MoNO <sub>5</sub> | C <sub>26</sub> H <sub>30</sub> MoN <sub>2</sub> O <sub>4</sub> |
| formula weight                           | 396.22                                            | 530.46                                                          |
| space group                              | <i>Pnma</i>                                       | <i>P-1</i>                                                      |
| <i>a</i> /Å                              | 23.3043(9)                                        | 12.833(8)                                                       |
| <i>b</i> /Å                              | 10.5340(4)                                        | 13.248(9)                                                       |
| <i>c</i> /Å                              | 14.0154(5)                                        | 16.906(11)                                                      |
| $\alpha$ /°                              | 90                                                | 94.485(10)                                                      |
| $\beta$ /°                               | 90                                                | 107.173(10)                                                     |
| $\gamma$ /°                              | 90                                                | 112.316(10)                                                     |
| <i>V</i> /Å <sup>3</sup>                 | 3440.6(2)                                         | 2481(3)                                                         |
| <i>Z</i>                                 | 8                                                 | 4                                                               |
| temperature (K)                          | 200(2)                                            | 200(2)                                                          |
| radiation ( $\lambda$ , Å)               | 0.71073                                           | 0.71073                                                         |
| $\rho$ (calcd.), g cm <sup>-3</sup>      | 1.530                                             | 1.420                                                           |
| $\mu$ (Mo K $\alpha$ ), mm <sup>-1</sup> | 0.785                                             | 0.562                                                           |
| $\theta$ max, deg.                       | 30.51                                             | 25.35                                                           |
| no. of data collected                    | 53927                                             | 27609                                                           |
| no. of data used                         | 5510                                              | 9079                                                            |
| no. of parameters                        | 235                                               | 959                                                             |
| $R_1$ [ $I > 2\sigma(I)$ ]               | 0.0349                                            | 0.0580                                                          |
| $wR_2$ [ $I > 2\sigma(I)$ ]              | 0.0911                                            | 0.0971                                                          |
| $R_1$ [all data]                         | 0.0454                                            | 0.1567                                                          |
| $wR_2$ [all data]                        | 0.0984                                            | 0.1273                                                          |
| GOF                                      | 1.053                                             | 0.956                                                           |



## References

- (1) (a) McNally, J. P.; Leong, V. S.; Cooper, N. J. in *Experimental Organometallic Chemistry*, Wayda, A. L.; Darensbourg, M. Y., Eds.; American Chemical Society: Washington, DC, 1987; Chapter 2, pp 6-23.  
(b) Burger, B.J.; Bercaw, J. E. in *Experimental Organometallic Chemistry*; Wayda, A. L.; Darensbourg, M. Y., Eds.; American Chemical Society: Washington, DC, 1987; Chapter 4, pp 79-98.  
(c) Shriver, D. F.; Drezdson, M. A.; *The Manipulation of Air-Sensitive Compounds*, 2<sup>nd</sup> Edition; Wiley-Interscience: New York, 1986.
- (2) Gottlieb, H. E.; Kotlyar, V.; Nudelman, A. J. *Org. Chem.* **1997**, *62*, 7512-7515.
- (3) (a) Sheldrick, G. M. SHELXTL, An Integrated System for Solving, Refining and Displaying Crystal Structures from Diffraction Data; University of Göttingen, Göttingen, Federal Republic of Germany, 1981.  
(b) Sheldrick, G. M. *Acta Cryst.* **2008**, *A64*, 112-122.
- (4) For literature data, see: King, R. B.; Saran, M. S. *Inorg. Chem.* **1974**, *13*, 74-78.
- (5) The reaction was performed at room temperature to minimize formation of  $\text{Mo}(\text{CO})_3(\text{CNBu}^t)_3$ .
- (6) For literature data, see: Albers, M. O.; Coville, N. J.; Singleton, E. J. *Chem. Soc., Dalton Trans.* **1982**, 1069-1079.
- (7) For a previous report, see: Halbauer, K.; Dönnecke, D.; Görls, H.; Imhof, W. Z. *Anorg. Allg. Chemie* **2006**, *632*, 1477-1482.
